# Supplementary material for: Identification of the potential mechanism of Radix pueraria in colon cancer based on network pharmacology
Source: PubMed Central journal article supplement (PMC8904787; doi:10.1038/s41598-022-07815-y), 2022-03-08
Supplement: 41598_2022_7815_MOESM1_ESM.pdf [file 41598_2022_7815_MOESM1_ESM.pdf]

**Supplementary Table S1:** RP components from TCMSP, ETCM, herbs, literature and CAS numbers for these components.

| <b>Components</b>           | <b>CASnumber</b> | <b>Source</b> |
|-----------------------------|------------------|---------------|
| formononetin                | 485-72-3         | TCMSP         |
| daidzein                    | 486-66-8         | TCMSP         |
| Ononin                      | 486-62-4         | TCMSP         |
| Docosanoate                 | 2636-16-0        | TCMSP         |
| LUPENONE                    | 1617-70-5        | TCMSP         |
| genistein                   | 446-72-0         | TCMSP         |
| lignoceric acid             | 557-59-5         | TCMSP         |
| scoparone                   | 120-08-1         | TCMSP         |
| (R)-Allantoin               | 885215-81-6      | TCMSP         |
| 3'-Methoxydaidzein          | 21913-98-4       | TCMSP         |
| Daidzein-4,7-diglucoside    | 53681-67-7       | TCMSP         |
| Soyasapogenol B             | 595-15-3         | TCMSP         |
| puerarin                    | 3681-99-0        | TCMSP         |
| 7,8,4'-Trihydroxyisoflavone | 75187-63-2       | TCMSP         |
| daidzin                     | 552-66-9         | TCMSP         |
| Sitosterol                  | 68555-08-8       | ETCM          |
| Dimethylesculetin           | 120-08-1         | ETCM          |
| Arachic Acid                | 506-30-9         | ETCM          |
| Arachidic Acid              | 506-30-9         | ETCM          |
| Daucosterol                 | 474-58-8         | ETCM          |
| Caproic Acid                | 142-62-1         | ETCM          |
| Eleutheroside A             | 474-58-8         | ETCM          |
| Formononetin-7-Glucoside    | 18524-03-3       | ETCM          |
| Coumestrol                  | 479-13-0         | ETCM          |
| Genistein 7-Glucoside       | 529-59-9         | ETCM          |
| Puerarin-Xyloside I         | 114240-18-5      | ETCM          |
| Tuberosin                   | 41347-45-9       | ETCM          |
| 1-formyl-beta-carboline     | 20127-63-3       | herb          |
| 4'-methoxypuerarin          | 92117-94-7       | herb          |
| 5-methylhydantoin           | 616-03-5         | herb          |
| coumingidine                | 434898-80-3      | herb          |
| dauricine                   | 524-17-4         | herb          |
| methyl-p-hydroxycinnamate   | 3901-07-3        | herb          |
| puerarin-xyloside           | 114240-18-5      | herb          |
| puerarol                    | 158020-56-5      | herb          |
| Robustadial A               | 88197-30-2       | herb          |
| Scopine                     | 498-45-3         | herb          |
| Isoliquiritigenin           | 961-29-5         | Literature    |
| d-mannitol                  | 69-65-8          | Literature    |
| coumestan                   | 479-12-9         | Literature    |

**Supplementary Table S2:** Results of HIA, Caco-2, HOB, and PPB for RP components from admetSAR.

| <b>Components</b>           | <b>HIA</b> | <b>Caco-2</b> | <b>HOB</b> | <b>PPB(100%)</b> | <b>Source</b> |
|-----------------------------|------------|---------------|------------|------------------|---------------|
| formononetin                | +0.9911    | +0.9313       | +0.5714    | 1.138            | TCMSP         |
| daidzein                    | +0.9893    | +0.9313       | +0.5714    | 0.831            | TCMSP         |
| Ononin                      | -0.4104    | -0.8314       | -0.5714    | 0.876            | TCMSP         |
| Docosanoate                 | +0.8476    | -0.5365       | -0.6714    | 1.027            | TCMSP         |
| LUPENONE                    | +0.9914    | -0.5206       | -0.5571    | 1.133            | TCMSP         |
| genistein                   | +0.9881    | +0.9525       | -0.6       | 0.88             | TCMSP         |
| lignoceric acid             | +0.9826    | -0.7491       | -0.5857    | 1.032            | TCMSP         |
| scoparone                   | +0.9916    | +0.8389       | +0.7143    | 0.986            | TCMSP         |
| (R)-Allantoin               | +0.9595    | -0.8144       | +0.7429    | 0.376            | TCMSP         |
| 3'-Methoxydaidzein          | +0.9911    | +0.886        | +0.6       | 1.055            | TCMSP         |
| Daidzein-4,7-diglucoside    | -0.5168    | -0.9071       | -0.5857    | 0.883            | TCMSP         |
| Soyasapogenol B             | +0.9884    | +0.5326       | -0.5143    | 0.826            | TCMSP         |
| puerarin                    | +0.8959    | -0.9373       | -0.7       | 0.859            | TCMSP         |
| 7,8,4'-Trihydroxyisoflavone | +0.9852    | +0.7064       | -0.6143    | 0.849            | TCMSP         |
| daidzin                     | -0.4589    | -0.9373       | -0.7143    | 0.766            | TCMSP         |
| Sitosterol                  | +0.993     | +0.5385       | +0.5286    | 1.124            | ETCM          |
| Dimethylesculetin           | +0.9812    | +0.5962       | +0.6143    | 1.144            | ETCM          |
| Arachic Acid                | +0.8417    | +0.5331       | -0.6714    | 0.871            | ETCM          |
| Arachidic Acid              | +0.8417    | +0.7107       | -0.6714    | 0.851            | ETCM          |
| Daucosterol                 | -0.6476    | -0.8381       | -0.7143    | 1.035            | ETCM          |
| Caproic Acid                | +0.8417    | +0.8296       | +0.7429    | 0.232            | ETCM          |
| Eleutheroside A             | +0.9266    | -0.766        | -0.7143    | 1.023            | ETCM          |
| Formononetin-7-Glucoside    | -0.4104    | -0.8314       | -0.5714    | 0.888            | ETCM          |
| Coumestrol                  | +0.9856    | -0.5364       | +0.5571    | 0.854            | ETCM          |
| Genistein 7-Glucoside       | +0.9348    | -0.7971       | -0.7429    | 0.808            | ETCM          |
| Puerarin-Xyloside I         | +0.9263    | -0.8661       | -0.7429    | 0.666            | ETCM          |
| Tuberosin                   | +0.9881    | +0.5673       | -0.6571    | 1.079            | ETCM          |
| 1-formyl-beta-carboline     | +0.9928    | -0.5643       | +0.5571    | 0.729            | herb          |
| 4'-methoxypuerarin          | +0.9742    | -0.8961       | -0.6286    | 0.842            | herb          |
| 5-methylhydantoin           | +0.9763    | -0.7813       | +0.7857    | 0.486            | herb          |
| coumingidine                | +0.9938    | -0.6253       | -0.7       | 1.208            | herb          |
| dauricine                   | +0.9864    | -0.7621       | -0.5286    | 1.004            | herb          |
| methyl-p-hydroxycinnamate   | +0.9868    | +0.9033       | -0.7286    | 0.704            | herb          |
| puerarin-xyloside           | +0.9263    | -0.866        | -0.7429    | 0.666            | herb          |
| puerarol                    | +0.9839    | -0.7122       | -0.5571    | 0.999            | herb          |
| robustadiol a               | +0.9831    | +0.6544       | -0.5286    | 1.095            | herb          |

|                   |         |         |         |       |            |
|-------------------|---------|---------|---------|-------|------------|
| Scopine           | +0.9547 | +0.6525 | -0.5    | 0.554 | herb       |
| Isoliquiritigenin | +0.9803 | +0.9313 | -0.5286 | 0.62  | Literature |
| d-mannitol        | +0.8011 | -0.9372 | -0.7571 | 0.064 | Literature |
| coumestan         | +0.9785 | +0.5843 | +0.7429 | 0.91  | Literature |

**Supplementary Table S3:** The probability of the active ingredient predicted by the Swiss Target Prediction database is greater than 0 for relevant target informations.

| Constituent        | Target  | Uniprot ID | Probability |
|--------------------|---------|------------|-------------|
| 3'-Methoxydaidzein | TYR     | P14679     | 0.196657136 |
| 3'-Methoxydaidzein | MIF     | P14174     | 0.196657136 |
| 3'-Methoxydaidzein | CYP19A1 | P11511     | 0.180252494 |
| 3'-Methoxydaidzein | CA7     | P43166     | 0.180252494 |
| 3'-Methoxydaidzein | HSD17B2 | P37059     | 0.180252494 |
| 3'-Methoxydaidzein | CA12    | O43570     | 0.180252494 |
| 3'-Methoxydaidzein | CA4     | P22748     | 0.180252494 |
| 3'-Methoxydaidzein | CBR1    | P16152     | 0.180252494 |
| 3'-Methoxydaidzein | ABCB1   | P08183     | 0.163737226 |
| 3'-Methoxydaidzein | PPARA   | Q07869     | 0.147256737 |
| 3'-Methoxydaidzein | ESR1    | P03372     | 0.130791955 |
| 3'-Methoxydaidzein | ESR2    | Q92731     | 0.130791955 |
| 3'-Methoxydaidzein | EGFR    | P00533     | 0.122581769 |
| 3'-Methoxydaidzein | PTPRS   | Q13332     | 0.122581769 |
| 3'-Methoxydaidzein | TLR9    | Q9NR96     | 0.114337559 |
| 3'-Methoxydaidzein | HSD17B1 | P14061     | 0.114337559 |
| 3'-Methoxydaidzein | ALDH2   | P05091     | 0.106099949 |
| 3'-Methoxydaidzein | MAOB    | P27338     | 0.106099949 |
| 3'-Methoxydaidzein | ALOX12  | P18054     | 0.106099949 |
| 3'-Methoxydaidzein | TBXAS1  | P24557     | 0.106099949 |
| 3'-Methoxydaidzein | MAOA    | P21397     | 0.106099949 |
| 3'-Methoxydaidzein | MGAM    | O43451     | 0.106099949 |
| 3'-Methoxydaidzein | HTR2A   | P28223     | 0.106099949 |
| 3'-Methoxydaidzein | HTR2C   | P28335     | 0.106099949 |
| 3'-Methoxydaidzein | ADORA1  | P30542     | 0.106099949 |
| 3'-Methoxydaidzein | ADORA2A | P29274     | 0.106099949 |
| 3'-Methoxydaidzein | ESRRA   | P11474     | 0.106099949 |
| 3'-Methoxydaidzein | ESRRB   | O95718     | 0.106099949 |
| 3'-Methoxydaidzein | ABCG2   | Q9UNQ0     | 0.106099949 |
| 3'-Methoxydaidzein | CA2     | P00918     | 0.106099949 |
| 3'-Methoxydaidzein | XDH     | P47989     | 0.106099949 |
| 3'-Methoxydaidzein | PTGS1   | P23219     | 0.097874534 |

|                    |          |        |             |
|--------------------|----------|--------|-------------|
| 3'-Methoxydaidzein | SLC6A2   | P23975 | 0.097874534 |
| 3'-Methoxydaidzein | PFKFB3   | Q16875 | 0.097874534 |
| 3'-Methoxydaidzein | IL2      | P60568 | 0.097874534 |
| 3'-Methoxydaidzein | NOX4     | Q9NPH5 | 0.097874534 |
| 3'-Methoxydaidzein | ALOX15   | P16050 | 0.097874534 |
| 3'-Methoxydaidzein | CA1      | P00915 | 0.097874534 |
| 3'-Methoxydaidzein | PON1     | P27169 | 0.097874534 |
| 3'-Methoxydaidzein | ACHE     | P22303 | 0.097874534 |
| 3'-Methoxydaidzein | PLAT     | P00750 | 0.097874534 |
| 3'-Methoxydaidzein | F10      | P00742 | 0.097874534 |
| 3'-Methoxydaidzein | PLAU     | P00749 | 0.097874534 |
| 3'-Methoxydaidzein | CDC7     | O00311 | 0.097874534 |
| 3'-Methoxydaidzein | PTPN1    | P18031 | 0.097874534 |
| 3'-Methoxydaidzein | ABCC1    | P33527 | 0.097874534 |
| 3'-Methoxydaidzein | CYP1B1   | Q16678 | 0.097874534 |
| 3'-Methoxydaidzein | STS      | P08842 | 0.097874534 |
| 3'-Methoxydaidzein | HSP90AB1 | P08238 | 0.097874534 |
| 3'-Methoxydaidzein | DUSP3    | P51452 | 0.097874534 |
| 3'-Methoxydaidzein | CDC25B   | P30305 | 0.097874534 |
| 3'-Methoxydaidzein | MCL1     | Q07820 | 0.097874534 |
| Coumestan          | NFKB1    | P19838 | 0.098947479 |
| Coumestan          | ACHE     | P22303 | 0.071715932 |
| Coumestan          | ESR1     | P03372 | 0.062621967 |
| Coumestan          | ESR2     | Q92731 | 0.062621967 |
| Coumestan          | CA2      | P00918 | 0.053556076 |
| Coumestan          | CA7      | P43166 | 0.053556076 |
| Coumestan          | CA1      | P00915 | 0.053556076 |
| Coumestan          | CA3      | P07451 | 0.053556076 |
| Coumestan          | CA6      | P23280 | 0.053556076 |
| Coumestan          | CA12     | O43570 | 0.053556076 |
| Coumestan          | CA14     | Q9ULX7 | 0.053556076 |
| Coumestan          | CA9      | Q16790 | 0.053556076 |
| Coumestan          | CA4      | P22748 | 0.053556076 |
| Coumestan          | CA13     | Q8N1Q1 | 0.053556076 |
| Coumestan          | CA5B     | Q9Y2D0 | 0.053556076 |
| Coumestan          | CA5A     | P35218 | 0.053556076 |
| Coumestan          | MAOA     | P21397 | 0.053556076 |
| Coumestan          | ALOX5    | P09917 | 0.053556076 |
| Coumestan          | CBR1     | P16152 | 0.053556076 |
| daidzein           | ALDH2    | P05091 | 1           |
| daidzein           | ESR1     | P03372 | 1           |
| daidzein           | CA7      | P43166 | 1           |
| daidzein           | ESR2     | Q92731 | 1           |

|          |         |        |             |
|----------|---------|--------|-------------|
| daidzein | CA12    | O43570 | 1           |
| daidzein | CA4     | P22748 | 1           |
| daidzein | TBXAS1  | P24557 | 0.52833091  |
| daidzein | MAOA    | P21397 | 0.52833091  |
| daidzein | EGFR    | P00533 | 0.52833091  |
| daidzein | MGAM    | O43451 | 0.52833091  |
| daidzein | HTR2A   | P28223 | 0.52833091  |
| daidzein | HTR2C   | P28335 | 0.52833091  |
| daidzein | ADORA1  | P30542 | 0.52833091  |
| daidzein | ADORA2A | P29274 | 0.52833091  |
| daidzein | HSD17B1 | P14061 | 0.52833091  |
| daidzein | ESRRA   | P11474 | 0.52833091  |
| daidzein | ESRRB   | O95718 | 0.52833091  |
| daidzein | ABCG2   | Q9UNQ0 | 0.52833091  |
| daidzein | CYP19A1 | P11511 | 0.387023621 |
| daidzein | ALOX12  | P18054 | 0.300567522 |
| daidzein | TYR     | P14679 | 0.292767344 |
| daidzein | MIF     | P14174 | 0.292767344 |
| daidzein | XDH     | P47989 | 0.229907127 |
| daidzein | PFKFB3  | Q16875 | 0.206337197 |
| daidzein | IL2     | P60568 | 0.198443988 |
| daidzein | CBR1    | P16152 | 0.182723414 |
| daidzein | HSD17B2 | P37059 | 0.167041662 |
| daidzein | ABCB1   | P08183 | 0.151315357 |
| daidzein | PTPRS   | Q13332 | 0.143473412 |
| daidzein | ALOX15  | P16050 | 0.143473412 |
| daidzein | PTGS1   | P23219 | 0.127750341 |
| daidzein | SLC6A2  | P23975 | 0.127750341 |
| daidzein | NOX4    | Q9NPH5 | 0.127750341 |
| daidzein | MAOB    | P27338 | 0.119895127 |
| daidzein | PON1    | P27169 | 0.119895127 |
| daidzein | CA2     | P00918 | 0.112041901 |
| daidzein | CA1     | P00915 | 0.112041901 |
| daidzein | STS     | P08842 | 0.112041901 |
| daidzein | ACHE    | P22303 | 0.112041901 |
| daidzein | TLR9    | Q9NR96 | 0.112041901 |
| daidzein | PPARA   | Q07869 | 0.112041901 |
| daidzein | ALOX5   | P09917 | 0.112041901 |
| daidzein | TNKS2   | Q9H2K2 | 0.112041901 |
| daidzein | TNKS    | O95271 | 0.112041901 |
| daidzein | PTPN1   | P18031 | 0.112041901 |
| daidzein | CA9     | Q16790 | 0.112041901 |
| daidzein | PLAT    | P00750 | 0.112041901 |

|                   |         |        |             |
|-------------------|---------|--------|-------------|
| daidzein          | F10     | P00742 | 0.112041901 |
| daidzein          | PLAU    | P00749 | 0.112041901 |
| daidzein          | CA5B    | Q9Y2D0 | 0.112041901 |
| daidzein          | PPARG   | P37231 | 0.112041901 |
| daidzein          | MCL1    | Q07820 | 0.112041901 |
| dimethylesculetin | HSD17B3 | P37058 | 0.33826033  |
| dimethylesculetin | CA12    | O43570 | 0.147464601 |
| dimethylesculetin | CA9     | Q16790 | 0.147464601 |
| dimethylesculetin | ESR1    | P03372 | 0.07148084  |
| dimethylesculetin | ESR2    | Q92731 | 0.07148084  |
| dimethylesculetin | MIF     | P14174 | 0.061946622 |
| dimethylesculetin | AKR1B1  | P15121 | 0.042894212 |
| dimethylesculetin | ERN1    | O75460 | 0.042894212 |
| dimethylesculetin | EGFR    | P00533 | 0.042894212 |
| dimethylesculetin | QDPR    | P09417 | 0.042894212 |
| dimethylesculetin | CA2     | P00918 | 0.042894212 |
| dimethylesculetin | CA7     | P43166 | 0.042894212 |
| dimethylesculetin | CA1     | P00915 | 0.042894212 |
| dimethylesculetin | CA14    | Q9ULX7 | 0.042894212 |
| dimethylesculetin | ALDH2   | P05091 | 0.042894212 |
| dimethylesculetin | MAOB    | P27338 | 0.042894212 |
| dimethylesculetin | PON1    | P27169 | 0.042894212 |
| dimethylesculetin | SNCA    | P37840 | 0.042894212 |
| dimethylesculetin | COMT    | P21964 | 0.042894212 |
| dimethylesculetin | MB      | P02144 | 0.042894212 |
| dimethylesculetin | NQO1    | P15559 | 0.042894212 |
| dimethylesculetin | CA3     | P07451 | 0.042894212 |
| dimethylesculetin | RNASEH1 | O60930 | 0.042894212 |
| dimethylesculetin | XDH     | P47989 | 0.042894212 |
| dimethylesculetin | CXCR1   | P25024 | 0.042894212 |
| dimethylesculetin | DAO     | P14920 | 0.042894212 |
| dimethylesculetin | NAT1    | P18440 | 0.042894212 |
| dimethylesculetin | CCNE1   | P24864 | 0.042894212 |
| dimethylesculetin | KCNMA1  | Q12791 | 0.042894212 |
| dimethylesculetin | PTK2B   | Q14289 | 0.042894212 |
| dimethylesculetin | ALPL    | P05186 | 0.042894212 |
| dimethylesculetin | PLAA    | Q9Y263 | 0.042894212 |
| dimethylesculetin | GPR35   | Q9HC97 | 0.042894212 |
| dimethylesculetin | CCND1   | P24385 | 0.042894212 |
| dimethylesculetin | FLT4    | P35916 | 0.042894212 |
| dimethylesculetin | INSR    | P06213 | 0.042894212 |
| dimethylesculetin | CDK2    | P24941 | 0.042894212 |
| dimethylesculetin | PTK2    | Q05397 | 0.042894212 |

|                   |         |        |             |
|-------------------|---------|--------|-------------|
| dimethylesculetin | PLK1    | P53350 | 0.042894212 |
| dimethylesculetin | CSNK2A1 | P68400 | 0.042894212 |
| dimethylesculetin | TEK     | Q02763 | 0.042894212 |
| dimethylesculetin | BACE1   | P56817 | 0.042894212 |
| dimethylesculetin | EPHB4   | P54760 | 0.042894212 |
| dimethylesculetin | HSPA1A  | P0DMV8 | 0.042894212 |
| dimethylesculetin | NUAK1   | O60285 | 0.042894212 |
| dimethylesculetin | FGR     | P09769 | 0.042894212 |
| dimethylesculetin | LYN     | P07948 | 0.042894212 |
| dimethylesculetin | PNMT    | P11086 | 0.042894212 |
| dimethylesculetin | CLK1    | P49759 | 0.042894212 |
| dimethylesculetin | DYRK1B  | Q9Y463 | 0.042894212 |
| dimethylesculetin | AXL     | P30530 | 0.042894212 |
| dimethylesculetin | STS     | P08842 | 0.042894212 |
| dimethylesculetin | SRC     | P12931 | 0.042894212 |
| dimethylesculetin | IDO1    | P14902 | 0.042894212 |
| formononetin      | IL2     | P60568 | 1           |
| formononetin      | CYP19A1 | P11511 | 0.288928252 |
| formononetin      | ALDH2   | P05091 | 0.182484829 |
| formononetin      | ESR1    | P03372 | 0.174270753 |
| formononetin      | CA12    | O43570 | 0.174270753 |
| formononetin      | ADORA1  | P30542 | 0.149732594 |
| formononetin      | ADORA2A | P29274 | 0.149732594 |
| formononetin      | TBXAS1  | P24557 | 0.149732594 |
| formononetin      | MAOA    | P21397 | 0.149732594 |
| formononetin      | MGAM    | O43451 | 0.149732594 |
| formononetin      | HTR2A   | P28223 | 0.149732594 |
| formononetin      | HTR2C   | P28335 | 0.149732594 |
| formononetin      | ESRRA   | P11474 | 0.149732594 |
| formononetin      | ESRRB   | O95718 | 0.149732594 |
| formononetin      | ABCG2   | Q9UNQ0 | 0.149732594 |
| formononetin      | CA7     | P43166 | 0.141522086 |
| formononetin      | HSD17B2 | P37059 | 0.141522086 |
| formononetin      | CA4     | P22748 | 0.141522086 |
| formononetin      | CBR1    | P16152 | 0.141522086 |
| formononetin      | SLC6A2  | P23975 | 0.133337961 |
| formononetin      | ALOX12  | P18054 | 0.133337961 |
| formononetin      | EGFR    | P00533 | 0.125142649 |
| formononetin      | TYR     | P14679 | 0.116965063 |
| formononetin      | XDH     | P47989 | 0.116965063 |
| formononetin      | PFKFB3  | Q16875 | 0.116965063 |
| formononetin      | ESR2    | Q92731 | 0.108770969 |
| formononetin      | PTPRS   | Q13332 | 0.108770969 |

|              |         |        |             |
|--------------|---------|--------|-------------|
| formononetin | HSD17B1 | P14061 | 0.108770969 |
| formononetin | ABCB1   | P08183 | 0.108770969 |
| formononetin | ALOX15  | P16050 | 0.108770969 |
| formononetin | MIF     | P14174 | 0.100578902 |
| formononetin | PPARA   | Q07869 | 0.100578902 |
| formononetin | PTGS1   | P23219 | 0.100578902 |
| formononetin | TLR9    | Q9NR96 | 0.100578902 |
| formononetin | MAOB    | P27338 | 0.100578902 |
| formononetin | CA2     | P00918 | 0.100578902 |
| formononetin | CA1     | P00915 | 0.100578902 |
| formononetin | NOX4    | Q9NPH5 | 0.100578902 |
| formononetin | PON1    | P27169 | 0.100578902 |
| formononetin | TNKS2   | Q9H2K2 | 0.100578902 |
| formononetin | TNKS    | O95271 | 0.100578902 |
| formononetin | ACHE    | P22303 | 0.100578902 |
| formononetin | CA3     | P07451 | 0.100578902 |
| formononetin | CA6     | P23280 | 0.100578902 |
| formononetin | CA14    | Q9ULX7 | 0.100578902 |
| formononetin | CA13    | Q8N1Q1 | 0.100578902 |
| formononetin | CA5B    | Q9Y2D0 | 0.100578902 |
| formononetin | CA5A    | P35218 | 0.100578902 |
| formononetin | DHODH   | Q02127 | 0.100578902 |
| formononetin | STS     | P08842 | 0.100578902 |
| formononetin | ERCC5   | P28715 | 0.100578902 |
| formononetin | FEN1    | P39748 | 0.100578902 |
| formononetin | RAF1    | P04049 | 0.100578902 |
| formononetin | CA9     | Q16790 | 0.100578902 |
| formononetin | PTPN1   | P18031 | 0.100578902 |
| formononetin | BACE1   | P56817 | 0.100578902 |
| Scoparone    | CA12    | O43570 | 0.480888333 |
| Scoparone    | CA9     | Q16790 | 0.480888333 |
| Scoparone    | CA13    | Q8N1Q1 | 0.395234372 |
| Scoparone    | CA7     | P43166 | 0.33826033  |
| Scoparone    | CA1     | P00915 | 0.204771117 |
| Scoparone    | CA14    | Q9ULX7 | 0.204771117 |
| Scoparone    | CA6     | P23280 | 0.185814992 |
| Scoparone    | CA5B    | Q9Y2D0 | 0.138112934 |
| Scoparone    | CA5A    | P35218 | 0.109507901 |
| Scoparone    | CA4     | P22748 | 0.090533089 |
| Scoparone    | XDH     | P47989 | 0.061946622 |
| Scoparone    | CA2     | P00918 | 0.05242396  |
| Scoparone    | EGFR    | P00533 | 0.05242396  |
| Scoparone    | SRD5A1  | P18405 | 0.05242396  |



|           |         |        |             |
|-----------|---------|--------|-------------|
| Scoparone | ALOX5   | P09917 | 0.042894212 |
| Scoparone | CBR1    | P16152 | 0.042894212 |
| Scoparone | CA3     | P07451 | 0.042894212 |
| Scoparone | SRC     | P12931 | 0.042894212 |
| Scoparone | MAOA    | P21397 | 0.042894212 |
| Scoparone | AKR1C1  | Q04828 | 0.042894212 |
| Scoparone | MAOB    | P27338 | 0.042894212 |
| Scoparone | GSK3B   | P49841 | 0.042894212 |
| Scoparone | AKR1B1  | P15121 | 0.042894212 |
| Scoparone | PTGS2   | P35354 | 0.042894212 |
| Scoparone | KCNA3   | P22001 | 0.042894212 |
| Scoparone | IGF1R   | P08069 | 0.042894212 |
| Scoparone | KDR     | P35968 | 0.042894212 |
| Scoparone | AURKA   | O14965 | 0.042894212 |
| Scoparone | ERBB2   | P04626 | 0.042894212 |
| Scoparone | ESR2    | Q92731 | 0.042894212 |
| Scoparone | PDE5A   | O76074 | 0.042894212 |
| Scoparone | PDE3A   | Q14432 | 0.042894212 |
| Scoparone | PDE3B   | Q13370 | 0.042894212 |
| Scoparone | GPR35   | Q9HC97 | 0.042894212 |
| Scoparone | SQLE    | Q14534 | 0.042894212 |
| Scoparone | FGR     | P09769 | 0.042894212 |
| Scoparone | LYN     | P07948 | 0.042894212 |
| Scoparone | ADAMTS5 | Q9UNA0 | 0.042894212 |
| Scoparone | BACE1   | P56817 | 0.042894212 |
| Scoparone | PARP1   | P09874 | 0.042894212 |
| Scoparone | PARP2   | Q9UGN5 | 0.042894212 |
| Scoparone | MAPK8   | P45983 | 0.042894212 |
| Scoparone | MPO     | P05164 | 0.042894212 |
| Scoparone | AURKB   | Q96GD4 | 0.042894212 |
| Scoparone | CDK2    | P24941 | 0.042894212 |
| Scoparone | TYMP    | P19971 | 0.042894212 |
| Scoparone | GRM4    | Q14833 | 0.042894212 |
| Scoparone | CDC7    | O00311 | 0.042894212 |
| Scoparone | IKBKB   | O14920 | 0.042894212 |
| Scoparone | KCNN1   | Q92952 | 0.042894212 |
| Scoparone | KCNN3   | Q9UGI6 | 0.042894212 |
| Scoparone | KCNN2   | Q9H2S1 | 0.042894212 |
| Scoparone | CTSK    | P43235 | 0.042894212 |
| Scoparone | CTSS    | P25774 | 0.042894212 |
| Scoparone | CTSL    | P07711 | 0.042894212 |
| Scoparone | PDGFRB  | P09619 | 0.042894212 |
| Scoparone | FLT4    | P35916 | 0.042894212 |

|           |          |        |             |
|-----------|----------|--------|-------------|
| Scoparone | INSR     | P06213 | 0.042894212 |
| Scoparone | TEK      | Q02763 | 0.042894212 |
| Scoparone | EPHB4    | P54760 | 0.042894212 |
| Scoparone | CES1     | P23141 | 0.042894212 |
| Scoparone | MAPK10   | P53779 | 0.042894212 |
| Scoparone | CES2     | O00748 | 0.042894212 |
| Scoparone | EPHB3    | P54753 | 0.042894212 |
| Scoparone | PLK1     | P53350 | 0.042894212 |
| Scoparone | MAP2K3   | P46734 | 0.042894212 |
| Scoparone | BTK      | Q06187 | 0.042894212 |
| Scoparone | SYK      | P43405 | 0.042894212 |
| Scoparone | MAPK14   | Q16539 | 0.042894212 |
| Scoparone | ROCK2    | O75116 | 0.042894212 |
| Scoparone | CLK4     | Q9HAZ1 | 0.042894212 |
| Scoparone | RPS6KA5  | O75582 | 0.042894212 |
| Scoparone | RPS6KB1  | P23443 | 0.042894212 |
| Scoparone | PIM2     | Q9P1W9 | 0.042894212 |
| Scoparone | PBK      | Q96KB5 | 0.042894212 |
| Scoparone | PIM3     | Q86V86 | 0.042894212 |
| Scoparone | NTRK3    | Q16288 | 0.042894212 |
| Scoparone | PRKX     | P51817 | 0.042894212 |
| Scoparone | MAP4K4   | O95819 | 0.042894212 |
| Scoparone | BRAF     | P15056 | 0.042894212 |
| Scoparone | PTPRC    | P08575 | 0.042894212 |
| Scoparone | MAP3K14  | Q99558 | 0.042894212 |
| Scoparone | JAK2     | O60674 | 0.042894212 |
| Scoparone | TYK2     | P29597 | 0.042894212 |
| Scoparone | DYRK1B   | Q9Y463 | 0.042894212 |
| Scoparone | MET      | P08581 | 0.042894212 |
| Scoparone | ICAM1    | P05362 | 0.042894212 |
| Scoparone | SELE     | P16581 | 0.042894212 |
| Scoparone | NQO2     | P16083 | 0.042894212 |
| Scoparone | TGM2     | P21980 | 0.042894212 |
| Scoparone | PTPN13   | Q12923 | 0.042894212 |
| Scoparone | MCL1     | Q07820 | 0.042894212 |
| Scoparone | KDM4C    | Q9H3R0 | 0.042894212 |
| Scoparone | METAP1   | P53582 | 0.042894212 |
| Scoparone | APEX1    | P27695 | 0.042894212 |
| Scoparone | NUAK1    | O60285 | 0.042894212 |
| Scoparone | MAPKAPK2 | P49137 | 0.042894212 |
| Scoparone | MPI      | P34949 | 0.042894212 |
| Scoparone | JAK1     | P23458 | 0.042894212 |
| Scoparone | GRM5     | P41594 | 0.042894212 |

|            |          |        |             |
|------------|----------|--------|-------------|
| Sitosterol | NPC1L1   | Q9UHC9 | 0.894285595 |
| Sitosterol | NR1H3    | Q13133 | 0.705989664 |
| Sitosterol | RORC     | P51449 | 0.564356791 |
| Sitosterol | HMGCR    | P04035 | 0.514371374 |
| Sitosterol | SHBG     | P04278 | 0.45601846  |
| Sitosterol | CYP51A1  | Q16850 | 0.381040074 |
| Sitosterol | CYP17A1  | P05093 | 0.356071235 |
| Sitosterol | CYP19A1  | P11511 | 0.314405075 |
| Sitosterol | SREBF2   | Q12772 | 0.314405075 |
| Sitosterol | AR       | P10275 | 0.264448566 |
| Sitosterol | RORA     | P35398 | 0.181090099 |
| Sitosterol | ESR1     | P03372 | 0.16447208  |
| Sitosterol | ESR2     | Q92731 | 0.16447208  |
| Sitosterol | PTPN1    | P18031 | 0.139453236 |
| Sitosterol | CYP2C19  | P33261 | 0.131155749 |
| Sitosterol | SLC6A2   | P23975 | 0.12282732  |
| Sitosterol | ACHE     | P22303 | 0.11449479  |
| Sitosterol | SERPINA6 | P08185 | 0.11449479  |
| Sitosterol | G6PD     | P11413 | 0.11449479  |
| Sitosterol | BCHE     | P06276 | 0.11449479  |
| Sitosterol | SLC6A4   | P31645 | 0.106165761 |
| Sitosterol | CHRM2    | P08172 | 0.106165761 |
| Sitosterol | NR1I3    | Q14994 | 0.106165761 |
| Sitosterol | NR1H2    | P55055 | 0.106165761 |
| Sitosterol | DHCR7    | Q9UBM7 | 0.106165761 |
| Sitosterol | PTGER1   | P34995 | 0.106165761 |
| Sitosterol | PTGER2   | P43116 | 0.106165761 |
| Sitosterol | VDR      | P11473 | 0.106165761 |
| Sitosterol | TBXAS1   | P24557 | 0.106165761 |
| Sitosterol | PTGES    | O14684 | 0.106165761 |
| Sitosterol | PPARD    | Q03181 | 0.106165761 |
| Sitosterol | CES2     | O00748 | 0.106165761 |
| Sitosterol | HSD11B1  | P28845 | 0.106165761 |
| Sitosterol | SQLE     | Q14534 | 0.106165761 |
| Sitosterol | PTPN6    | P29350 | 0.106165761 |
| Sitosterol | PTPN2    | P17706 | 0.106165761 |
| Sitosterol | GLRA1    | P23415 | 0.106165761 |
| Sitosterol | NOS2     | P35228 | 0.106165761 |
| Sitosterol | PPARG    | P37231 | 0.106165761 |
| Sitosterol | UGT2B7   | P16662 | 0.106165761 |
| Sitosterol | POLB     | P06746 | 0.106165761 |
| Puerarin   | CA7      | P43166 | 1           |
| Puerarin   | CA12     | O43570 | 1           |

|               |          |        |             |
|---------------|----------|--------|-------------|
| Puerarin      | AKR1B1   | P15121 | 0.11449479  |
| Puerarin      | SLC29A1  | Q99808 | 0.106165761 |
| Capronic acid | SLC22A6  | Q4U2R8 | 0.248387034 |
| Capronic acid | FABP4    | P15090 | 0.187830848 |
| Capronic acid | FABP3    | P05413 | 0.187830848 |
| Capronic acid | FABP5    | Q01469 | 0.187830848 |
| Capronic acid | PPARD    | Q03181 | 0.187830848 |
| Capronic acid | FFAR1    | O14842 | 0.187830848 |
| Capronic acid | FABP2    | P12104 | 0.187830848 |
| Capronic acid | HSD11B1  | P28845 | 0.135105168 |
| Capronic acid | AR       | P10275 | 0.105843861 |
| Capronic acid | VDR      | P11473 | 0.105843861 |
| Capronic acid | NR1H4    | Q96R11 | 0.105843861 |
| Capronic acid | POLB     | P06746 | 0.105843861 |
| Capronic acid | CDC25A   | P30304 | 0.105843861 |
| Capronic acid | GPBAR1   | Q8TDU6 | 0.105843861 |
| Capronic acid | AKR1B10  | O60218 | 0.105843861 |
| Capronic acid | PPARA    | Q07869 | 0.095255918 |
| Capronic acid | PHF8     | Q9UPP1 | 0.084973702 |
| Capronic acid | KDM5C    | P41229 | 0.084973702 |
| Capronic acid | UGT2B7   | P16662 | 0.084973702 |
| Capronic acid | CYP19A1  | P11511 | 0.074316474 |
| Capronic acid | SERPINA6 | P08185 | 0.074316474 |
| Capronic acid | SHBG     | P04278 | 0.074316474 |
| Capronic acid | HSD17B3  | P37058 | 0.074316474 |
| Capronic acid | G6PD     | P11413 | 0.074316474 |
| Capronic acid | GABBR1   | Q9UBS5 | 0.074316474 |
| Capronic acid | PTGER2   | P43116 | 0.064951087 |
| Capronic acid | PTGFR    | P43088 | 0.064951087 |
| Capronic acid | FNTA     | P49354 | 0.064951087 |
| Capronic acid | NPC1L1   | Q9UHC9 | 0.054487947 |
| Capronic acid | GABRA2   | P47869 | 0.054487947 |
| Capronic acid | HSD11B2  | P80365 | 0.044308319 |
| Capronic acid | HAO1     | Q9UJM8 | 0.044308319 |
| Capronic acid | KDM2A    | Q9Y2K7 | 0.03397069  |
| Capronic acid | PLG      | P00747 | 0.03397069  |
| Capronic acid | PTPN1    | P18031 | 0.03397069  |
| Capronic acid | GSTK1    | Q9Y2Q3 | 0.03397069  |
| Capronic acid | LTA4H    | P09960 | 0.03397069  |
| Capronic acid | CDC45    | O75419 | 0.023832743 |
| Capronic acid | PTPRC    | P08575 | 0.023832743 |
| Capronic acid | CA2      | P00918 | 0.023832743 |
| Capronic acid | CA1      | P00915 | 0.023832743 |

|               |       |        |             |
|---------------|-------|--------|-------------|
| Capronic acid | HMGCR | P04035 | 0.023832743 |
|---------------|-------|--------|-------------|

**Supplementary Table S4:** 201 common gene targets between RP and CC.

| Common targets | Common targets | Common targets |
|----------------|----------------|----------------|
| TYR            | G6PD           | PDE3B          |
| MIF            | GABBR1         | SQLE           |
| CYP19A1        | PTGER2         | ADAMTS5        |
| CA7            | PTGFR          | PARP1          |
| HSD17B2        | NPC1L1         | PARP2          |
| CA12           | HSD11B2        | MAPK8          |
| CA4            | HAO1           | MPO            |
| CBR1           | KDM2A          | AURKB          |
| ABCB1          | PLG            | TYMP           |
| PPARA          | GSTK1          | GRM4           |
| ESR1           | LTA4H          | IKBKB          |
| ESR2           | CDC45          | KCNN1          |
| EGFR           | PTPRC          | KCNN3          |
| PTPRS          | HMGCR          | KCNN2          |
| TLR9           | NFKB1          | CTSK           |
| HSD17B1        | CA3            | CTSS           |
| ALDH2          | CA6            | CTSL           |
| MAOB           | CA14           | PDGFRB         |
| ALOX12         | CA9            | CES1           |
| TBXAS1         | CA13           | MAPK10         |
| MAOA           | CA5A           | CES2           |
| MGAM           | ALOX5          | EPHB3          |
| HTR2A          | TNKS2          | MAP2K3         |
| HTR2C          | TNKS           | BTK            |
| ADORA1         | PPARG          | SYK            |
| ADORA2A        | AKR1B1         | MAPK14         |
| ESRRA          | ERN1           | ROCK2          |
| ESRRB          | QDPR           | CLK4           |
| ABCG2          | SNCA           | RPS6KA5        |
| CA2            | COMT           | RPS6KB1        |
| XDH            | MB             | PIM2           |
| PTGS1          | NQO1           | PBK            |
| SLC6A2         | CXCR1          | PIM3           |
| PFKFB3         | DAO            | NTRK3          |
| IL2            | NAT1           | PRKX           |
| NOX4           | KCNMA1         | MAP4K4         |
| ALOX15         | PTK2B          | BRAF           |
| CA1            | ALPL           | MAP3K14        |
| PON1           | PLAA           | JAK2           |

|          |         |          |
|----------|---------|----------|
| ACHE     | GPR35   | TYK2     |
| PLAT     | FLT4    | MET      |
| F10      | INSR    | ICAM1    |
| PLAU     | PTK2    | SELE     |
| CDC7     | PLK1    | NQO2     |
| PTPN1    | CSNK2A1 | TGM2     |
| ABCC1    | TEK     | PTPN13   |
| CYP1B1   | BACE1   | KDM4C    |
| STS      | EPHB4   | METAP1   |
| HSP90AB1 | HSPA1A  | APEX1    |
| DUSP3    | NUAK1   | MAPKAPK2 |
| CDC25B   | FGR     | MPI      |
| MCL1     | LYN     | JAK1     |
| SLC22A6  | PNMT    | GRM5     |
| FABP4    | CLK1    | NR1H3    |
| FABP3    | DYRK1B  | RORC     |
| FABP5    | AXL     | CYP51A1  |
| PPARD    | SRC     | CYP17A1  |
| FFAR1    | IDO1    | SREBF2   |
| FABP2    | DHODH   | RORA     |
| HSD11B1  | ERCC5   | CYP2C19  |
| AR       | FEN1    | BCHE     |
| VDR      | RAF1    | SLC6A4   |
| NR1H4    | SRD5A1  | CHRM2    |
| POLB     | AKR1C1  | NR1I3    |
| CDC25A   | GSK3B   | NR1H2    |
| GPBAR1   | PTGS2   | DHCR7    |
| AKR1B10  | KCNA3   | PTGER1   |
| PHF8     | IGF1R   | PTGES    |
| KDM5C    | KDR     | PTPN6    |
| UGT2B7   | AURKA   | PTPN2    |
| SERPINA6 | ERBB2   | GLRA1    |
| SHBG     | PDE5A   | NOS2     |
| HSD17B3  | PDE3A   | SLC29A1  |

**Supplementary Table S5:** The first 20 KEGG pathways information.

| Description                | p.adjust | GeneSympol                                                                                                                                                                                           | Count |
|----------------------------|----------|------------------------------------------------------------------------------------------------------------------------------------------------------------------------------------------------------|-------|
| PI3K-Akt signaling pathway | -10.53   | CHRM2,EGFR,ERBB2,FLT4,GSK3B,HSP90AB1,IGF1R,IKBKB,IL2,INSR,JAK1,JAK2,KDR,MCL1,MET,NFKB1,PDGFRB,PTK2,RAF1,RPS6KB1,SYK,TEK,ADORA2A,BRAF,MAPK14,MAP2K3,SRC,CSNK2A1,PTPN1,PTPN6,MAPK8,MAPK10,HSPA1A,CXCR1 | 22    |

|                                           |        |                                                                                                                                                                                                                                                                                                                                                                                                                                                             |    |
|-------------------------------------------|--------|-------------------------------------------------------------------------------------------------------------------------------------------------------------------------------------------------------------------------------------------------------------------------------------------------------------------------------------------------------------------------------------------------------------------------------------------------------------|----|
| MicroRNAs in cancer                       | -7.63  | CDC25A,CDC25B,CYP1B1,EGFR,ERBB2,IKBKB,MCL1,MET,ABCC1,NFKB1,PDGFRB,ABCB1,PLAU,PTGS2,RAF1,RPS6KA5                                                                                                                                                                                                                                                                                                                                                             | 16 |
| EGFR tyrosine kinase inhibitor resistance | -12.72 | AXL,BRAF,EGFR,ERBB2,GSK3B,IGF1R,JAK1,JAK2,KDR,MET,PDGFRB,RAF1,RPS6KB1,SRC,AR,HSP90AB1,IKBKB,NFKB1,NOS2,PPARD,PPARG,MAPK8,MAPK10,PTGER1,PTGER2,PTGS2,PTK2,ROCK2,MAPK14,ESR1,ESR2,CTSL,PLAU,PTPN6,FLT4,CDC25A,CDC25B,PDE3B,PLK1,TYMP,RPS6KA5,INSR,PTPN1,G6PD,NTRK3,GABBR1,HSPA1A,GRM5,HTR2A,HTR2C,ERN1,CHRM2,LYN                                                                                                                                              | 14 |
| Serotonergic synapse                      | -10.42 | ALOX12,ALOX5,ALOX15,BRAF,CYP2C19,HTR2A,HTR2C,KCNN2,MAOA,MAOB,PTGS1,PTGS2,RAF1,SLC6A4,CBR1,LTA4H,TBXAS1,PTGES                                                                                                                                                                                                                                                                                                                                                | 14 |
| Apoptosis                                 | -9.63  | PARP1,CTSK,CTSL,CTSS,ERN1,IKBKB,MCL1,NFKB1,MAPK8,MAPK10,PTPN13,RAF1,MAP3K14,PARP2,MAPK14,EGFR,CXCR1,LYN,MET,SRC,CSNK2A1,FGR,GSK3B,HSPA1A,ICAM1,JAK1,MAP2K3,SYK,TYK2,NQO1,HSP90AB1,KDR,PLAT,PTK2,SELE,CYP17A1,ESR1,ESR2,JAK2,BRAF,CDC25B,DUSP3,PDGFRB,RPS6KA5,MAPKAPK2,MAP4K4,PPARA,NR1H3,IL2,RORA,RORC,ALOX5,NOS2,PLG,BTK,PPARG,PTGS2,INSR,PTPN1,RPS6KB1,NR1H2,PTK2B,VDR,TLR9,ERBB2,NTRK3,PTGS1,ALOX12,HTR2A,HTR2C,PTGER2,ROCK2,NOX4,ADORA1,ABCC1,POLB,GRM5 | 14 |
| cAMP signaling pathway                    | -8.05  | ADORA1,ADORA2A,BRAF,CHRM2,GABBR1,NFKB1,PDE3A,PDE3B,PPARA,MAPK8,MAPK10,PTGER2,RAF1,ROCK2,FABP4,INSR,PTGS1,PTGS2,KCNMA1,PDE5A                                                                                                                                                                                                                                                                                                                                 | 14 |
| Steroid hormone biosynthesis              | -12.94 | STS,COMT,CYP1B1,CYP17A1,CYP19A1,AKR1C1,HSD11B1,HSD11B2,HSD17B1,HSD17B3,HSD17B2,SRD5A1,UGT2B7,ALOX5,IGF1R,INSR,PTGS2                                                                                                                                                                                                                                                                                                                                         | 13 |
| Chemokine signaling pathway               | -7.6   | BRAF,PTK2B,FGR,GSK3B,IKBKB,CXCR1,JAK2,LYN,NFKB1,PTK2,RAF1,SRC,ROCK2,MAPK14,KDR,PTGS2,MAPKAPK2,EPHB3,EPHB4,MET                                                                                                                                                                                                                                                                                                                                               | 13 |
| drug metabolism                           | -8.57  | NAT1,CES1,CYP2C19,TYMP,MAOA,MAOB,MPO,SLC6A2,UGT2B7,XDH,CES2,GSTK1                                                                                                                                                                                                                                                                                                                                                                                           | 12 |
| Calcium signaling pathway                 | -6.67  | ADORA2A,CHRM2,EGFR,ERBB2,PTK2B,GRM5,HTR2A,HTR2C,NOS2,PDGFRB,PTGER1,PTGFR,ADORA1,GABBR1,GLRA1,GPR35,GRM4,PLG,PTGER2                                                                                                                                                                                                                                                                                                                                          | 12 |
| Nitrogen metabolism                       | -16.66 | CA1,CA2,CA3,CA4,CA5A,CA6,CA7,CA9,CA12,CA14,CA13                                                                                                                                                                                                                                                                                                                                                                                                             | 11 |

|                                   |       |                                                                                                             |    |
|-----------------------------------|-------|-------------------------------------------------------------------------------------------------------------|----|
| NF-kappa B signaling pathway      | -8.4  | PARP1,BTK,CSNK2A1,ICAM1,IKBKB,LYN,NFKB1,PLAU,PTGS2,SYK,MAP3K14                                              | 11 |
| Phospholipase D signaling pathway | -5.75 | EGFR,PTK2B,GRM4,GRM5,CXCR1,INSR,PDGFRB,PTGFR,RAF1,SYK,BRAF,ICAM1,PTPN6                                      | 10 |
| Chemical carcinogenesis           | -6.5  | NAT1,CBR1,CYP1B1,CYP2C19,HSD11B1,PTGS2,SLC6A2,UGT2B7,GSTK1,AKR1C1                                           | 9  |
| HIF-1 signaling pathway           | -5.53 | EGFR,ERBB2,IGF1R,INSR,NFKB1,NOS2,PFKFB3,RPS6KB1,TEK,HSPA1A,PPARG,HMGCR                                      | 9  |
| B cell receptor signaling pathway | -6.13 | BTK,GSK3B,IKBKB,LYN,NFKB1,PTPN6,RAF1,SYK,MAPK14,IL2,PTPRC,MAP3K14,BRAF,PPARD,RPS6KB1,PIM2                   | 8  |
| PPAR signaling pathway            | -6.09 | FABP4,FABP2,FABP3,FABP5,PPARA,PPARD,PPARG,NR1H3                                                             | 8  |
| Leishmania infection              | -4.98 | MAPK14,JAK1,JAK2,NFKB1,NOS2,PTGS2,PTPN6,IKBKB,PTK2,AKR1C1                                                   | 7  |
| Tyrosine metabolism               | -5.68 | COMT,MAOA,MAOB,MIF,PNMT,TYR,ALDH2,CYP1B1,IDO1,DAO,NOS2,MAPK14,GSK3B,MAPK8,MAPK10,CYP2C19,UGT2B7,GSTK1,NFKB1 | 6  |
| Antifolate resistance             | -4.62 | ALOX12,IKBKB,ABCC1,NFKB1,ABCG2,ABCB1                                                                        | 5  |
